# Supplementary material
Source: Springer Nature journal article supplement (https://www.springermedizin.de/resource/supplementary/12889_2012_4648_MOESM3_ESM.pdf/9493028)

## Familiar Brands

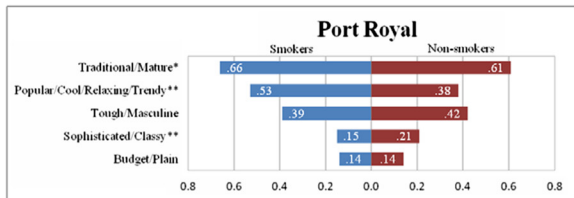

## Unfamiliar Brands

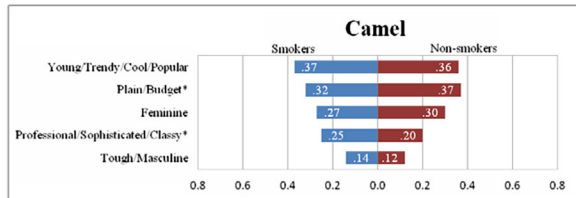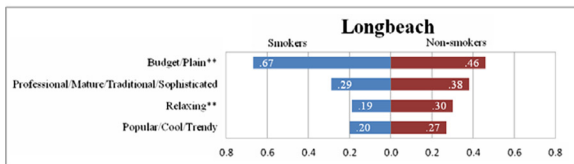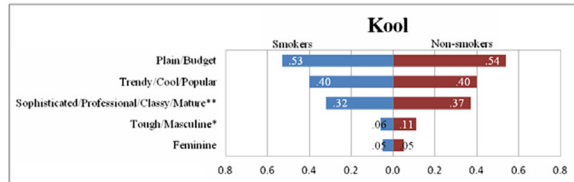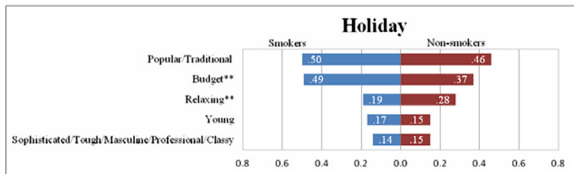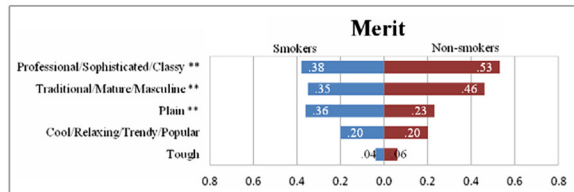

Supplement: MOESM3 [file 9493028]
